# Supplementary material
Source: Royal Society of Chemistry journal article supplement (doi:10.1039/d6fo00994h)
Supplement: d6fo00994h1.pdf [file d6fo00994h1.pdf]

# Supplementary Material

## The hypouricemic and renal protective effects of the Chinese functional tea *Ligustrum robustum* on hyperuricemic mice

| Contents                                                                                                                                                                                             | Page |
|------------------------------------------------------------------------------------------------------------------------------------------------------------------------------------------------------|------|
| <b>Table S1.</b> PCR primer sequences and protocols.                                                                                                                                                 | 1    |
| <b>Table S2.</b> The weight, fractionation rate, dosing amount, and normalization ratio of each eluted fraction from LR.                                                                             | 1    |
| <b>Table S3.</b> MRM parameters of 2 components and internal standards.                                                                                                                              | 1    |
| <b>Fig. S1.</b> Triplicate original XOD protein imprinting images of the Western blot analysis.                                                                                                      | 2    |
| <b>Fig. S2.</b> Effects of LR on (A) body weight, and (B) liver, (C) kidney, and (D) spleen coefficients.                                                                                            | 2    |
| <b>Fig. S3.</b> Triplicate original URAT1, GLUT9, OAT4, ABCG2, OAT1, OAT3 protein imprinting images of the Western blot analysis.                                                                    | 5    |
| <b>Table S4.</b> Quality analysis of transcriptome sequencing data of different samples.                                                                                                             | 6    |
| <b>Fig. S4.</b> Correlation thermograms between samples in different groups.                                                                                                                         | 6    |
| <b>Fig. S5.</b> Principal component analysis of individual replicates.                                                                                                                               | 7    |
| <b>Table S5.</b> FPKM values of 41 transcriptome-derived DEGs reversed by LRH.                                                                                                                       | 7    |
| <b>Table S6.</b> Top 10 KEGG pathways enriched by the 41 DEGs.                                                                                                                                       | 9    |
| <b>Table S7.</b> Transcription factors for key genes in the TNF/NF- $\kappa$ B signaling pathway.                                                                                                    | 9    |
| <b>Fig. S6.</b> Triplicate original TNF- $\alpha$ , IL-1 $\beta$ , IL-6, TNFR1, p-I $\kappa$ B $\alpha$ , I $\kappa$ B $\alpha$ , p-p65, p65 protein imprinting images of the Western blot analysis. | 12   |
| <b>Fig. S7.</b> The representative UHPLC-Q-Orbitrap HRMS base peak chromatogram (BPC) of the respective fractions.                                                                                   | 12   |
| <b>Fig. S8.</b> Permutation test validation plot of the OPLS model.                                                                                                                                  | 13   |
| <b>Fig. S9.</b> Chemical structures of the 20 putative active compounds.                                                                                                                             | 14   |
| <b>Table S8.</b> 20 putative active components from LR: VIP values, RC values, and binding energies with XOD.                                                                                        | 15   |
| <b>Fig. S10.</b> Quantitative determination of compounds verbascoside (4) and ligupurpurosides A (5) by LC-MS.                                                                                       | 16   |

|                                                                                                                   |    |
|-------------------------------------------------------------------------------------------------------------------|----|
| <b>Fig. S11.</b> Inhibitory effects of ligupurpuroside A, verbascoside, and allopurinol on XOD activity in vitro. | 16 |
| <b>1.</b> Experimental Section                                                                                    | 17 |
| <b>1.1</b> Induction of HUA and treatment with drugs                                                              | 17 |
| <b>1.2</b> Western blot analysis                                                                                  | 17 |
| <b>1.3</b> RT-qPCR analysis                                                                                       | 18 |
| <b>1.4</b> Molecular dynamics simulation                                                                          | 18 |
| <b>1.5</b> Determination of XOD inhibitory activity                                                               | 19 |

**Table S1.** PCR primer sequences and protocols.

| Gene  | Sense primer(5'- 3')  | Antisense primer(5'- 3') | Product size (bp) | Tm(°C) |
|-------|-----------------------|--------------------------|-------------------|--------|
| Ccl5  | CCAAGTGTGTGCCAACCAGAA | ATGCCCATTTTCCCAGGACCG    | 191               | 60     |
| Edn1  | TGACGCACAACCGAGCACAT  | TGGTCCTCTGCCCGTCTGAA     | 169               | 60     |
| Mmp3  | TGGGCTATACGAGGGCACGA  | TTCACGGTTGCAGGGAGACC     | 77                | 60     |
| Socs3 | ACCCAGTCGGGGACCAAGAA  | GGTTCCGTGGGTGGCAAAGA     | 173               | 60     |
| Spi1  | ATGTCAAGGGAGGGGGCTCA  | ATCCCCCTCAGGACCAGGTG     | 115               | 60     |
| Fos   | TTCAACGCCGACTACGAGGC  | GGAGATGGCTGTCACCGTGG     | 189               | 60     |
| Nr4a1 | AGAGACGCGAGTGCAGCC    | ACTCAAGGGCCAGGGGATCA     | 238               | 60     |
| Gapdh | CCTCGTCCCGTAGACAAAATG | TGAGGTCAATGAAGGGGTCGT    | 133               | 60     |

**Table S2.** The weight, fractionation rate, dosing amount, and normalization ratio of each eluted fraction from LR.

| Eluted Fractions | Weight ( g ) | Fractionation Rate ( % ) | Dosing Amount (mg/kg) | Normalization Ratio |
|------------------|--------------|--------------------------|-----------------------|---------------------|
| W1               | 30.1         | 40.13%                   | 220.47                | 1                   |
| W2               | 6.06         | 8.08%                    | 44.39                 | 4.97                |
| 25%MW            | 9.27         | 12.36%                   | 67.91                 | 3.25                |
| 35%MW            | 9.17         | 12.23%                   | 67.19                 | 3.28                |
| 50%MW            | 7.31         | 9.75%                    | 53.57                 | 4.12                |
| 60%MW            | 4.98         | 6.64%                    | 36.48                 | 6.04                |
| 70%MW            | 6.77         | 9.03                     | 49.61                 | 4.44                |

**Table S3.** MRM parameters of 2 components and internal standards.

| Compounds         | Precursor                | Production | Fragmentor(V) | CE(V) | CAV(V) |
|-------------------|--------------------------|------------|---------------|-------|--------|
| Verbascoside      | 623.2 [M-H] <sup>-</sup> | 461.2      | 145           | 20    | 5      |
| Ligupurpuroside A | 769.2 [M-H] <sup>-</sup> | 607.0      | 160           | 20    | 5      |
| Naringenin (ISTD) | 271.1 [M-H] <sup>-</sup> | 150.8      | 114           | 14    | 5      |

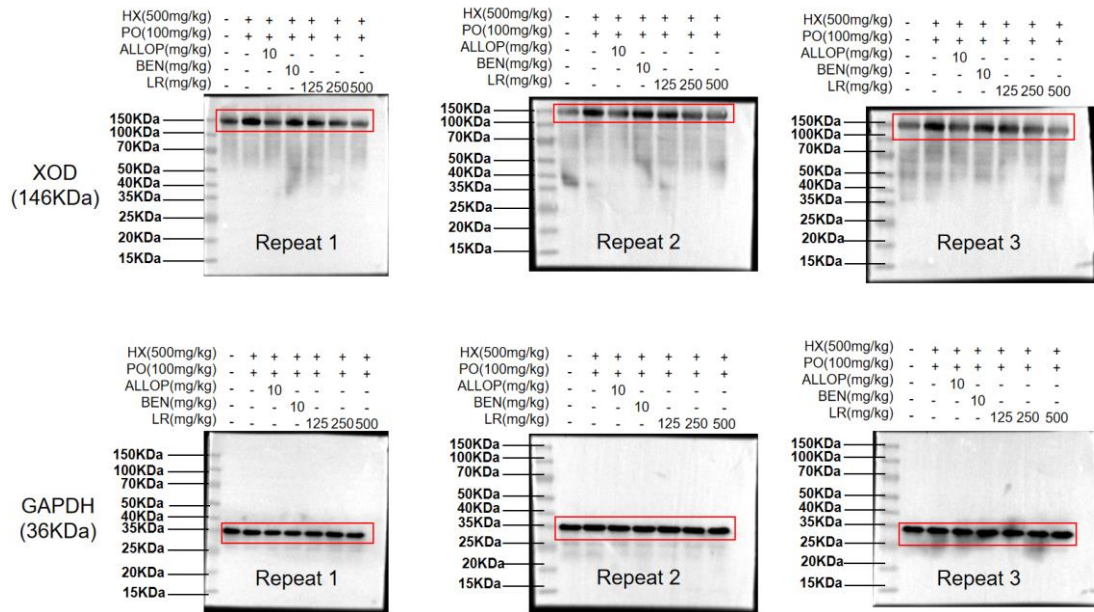

**Fig. S1.** Triplicate original XOD protein imprinting images of the Western blot analysis.

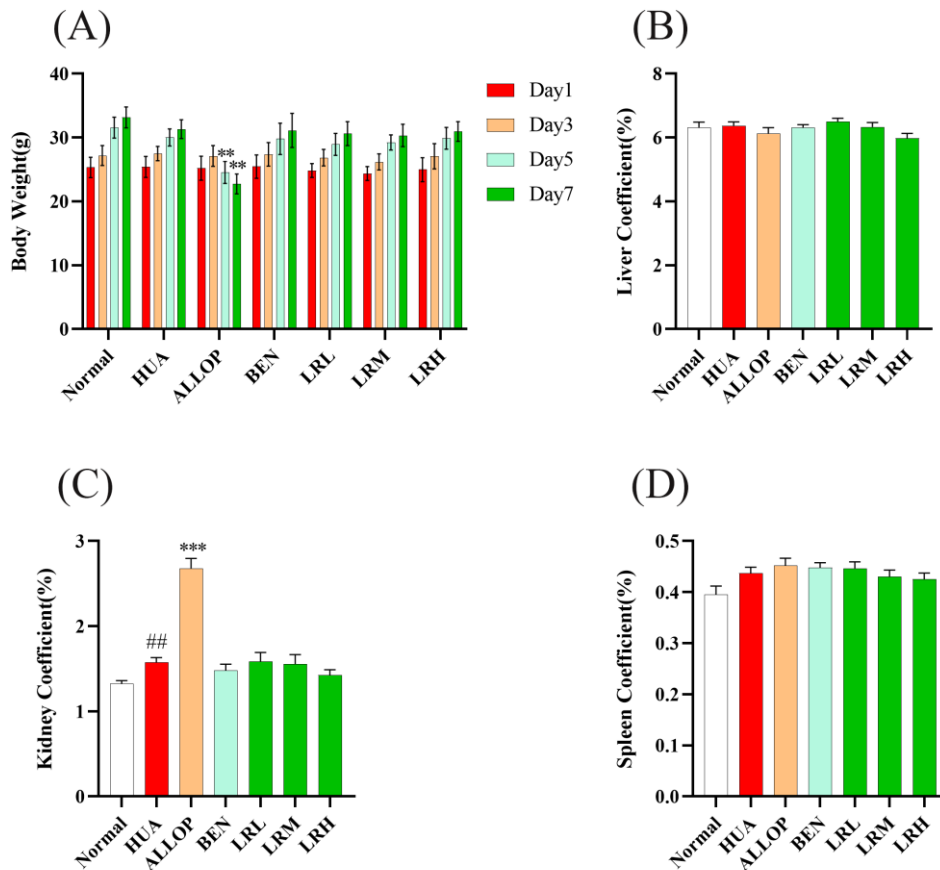

**Fig. S2.** Effects of LR on (A) body weight, and (B) liver, (C) kidney, and (D) spleen coefficients. The data were presented as the means  $\pm$  SEMs (n=10).  $##p < 0.01$  vs Normal;  $*p < 0.01$ ,  $**p < 0.01$ ,  $***p < 0.001$  vs HUA.

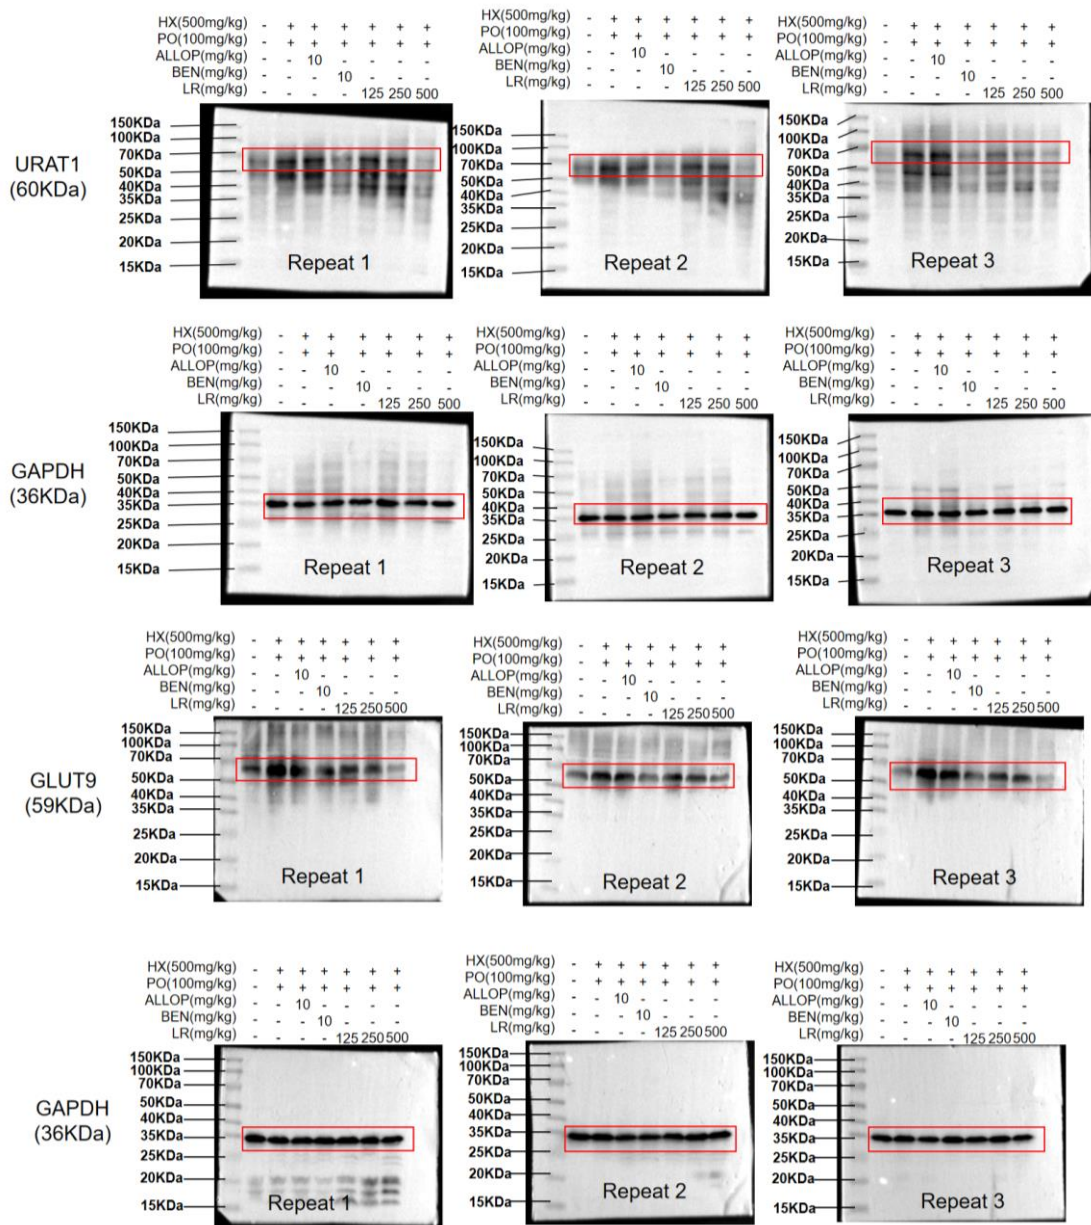



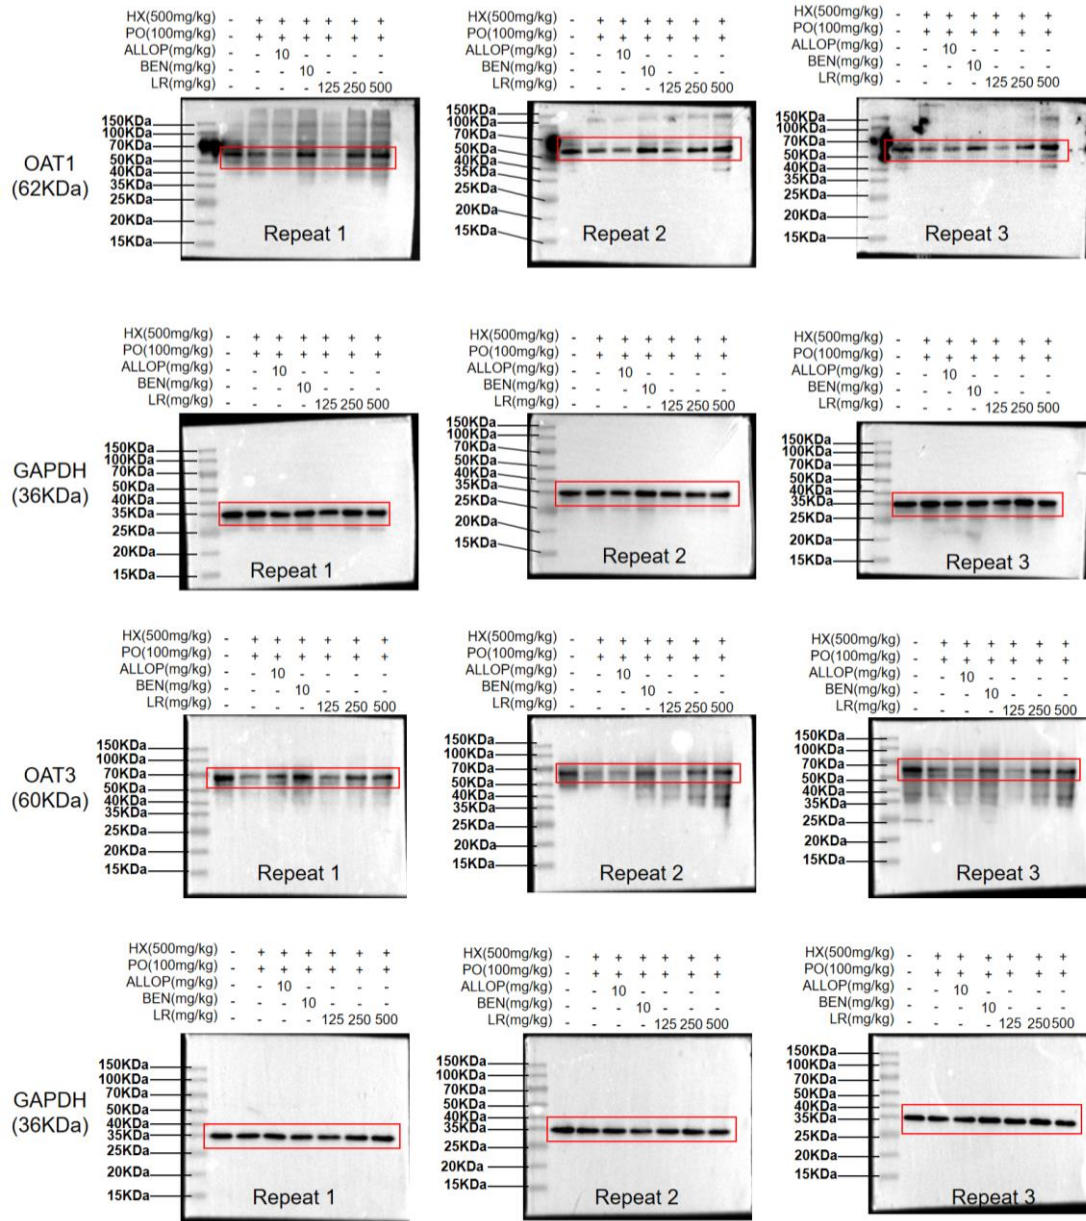

**Fig. S3.** Triplicate original URAT1, GLUT9, OAT4, ABCG2, OAT1, OAT3 protein imprinting images of the Western blot analysis.

**Table S4.** Quality analysis of transcriptome sequencing data of different samples.

| Sample   | Raw reads | Clean reads | Clean bases | Error (%) | Q20(%) | Q30(%) | GC(%) |
|----------|-----------|-------------|-------------|-----------|--------|--------|-------|
| Normal 1 | 49494494  | 49248520    | 7.32G       | 0.01      | 98.71  | 95.93  | 48.76 |
| Normal 2 | 47857394  | 47599446    | 7.07G       | 0.01      | 98.66  | 95.8   | 48.89 |
| Normal 3 | 48931152  | 48665592    | 7.24G       | 0.01      | 98.61  | 95.65  | 48.78 |
| LRH 1    | 52170050  | 51850082    | 7.7G        | 0.01      | 98.56  | 95.5   | 48.34 |
| LRH 2    | 44588840  | 44312118    | 6.57G       | 0.01      | 98.59  | 95.64  | 48.63 |
| LRH 3    | 54473448  | 54148372    | 8.04G       | 0.01      | 98.52  | 95.37  | 49.08 |
| HUA 1    | 52840408  | 52513708    | 7.83G       | 0.01      | 98.53  | 95.4   | 49.9  |
| HUA 2    | 54296352  | 53940972    | 8.02G       | 0.01      | 98.58  | 95.56  | 49.56 |
| HUA 3    | 52225008  | 51877140    | 7.72G       | 0.01      | 98.56  | 95.51  | 49.86 |

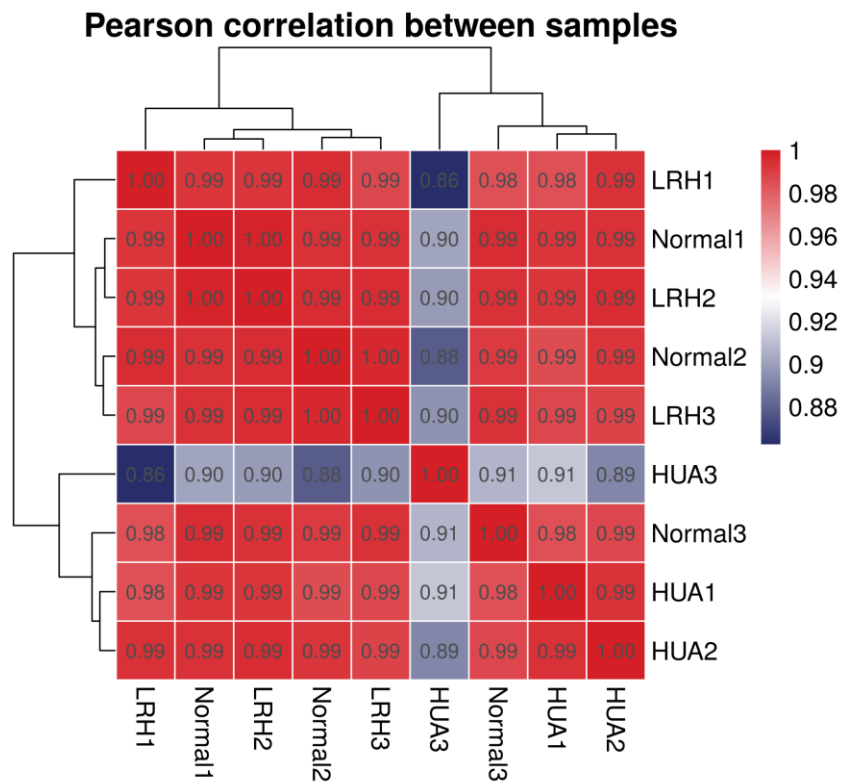

**Fig. S4.** Correlation thermograms between samples in different groups.

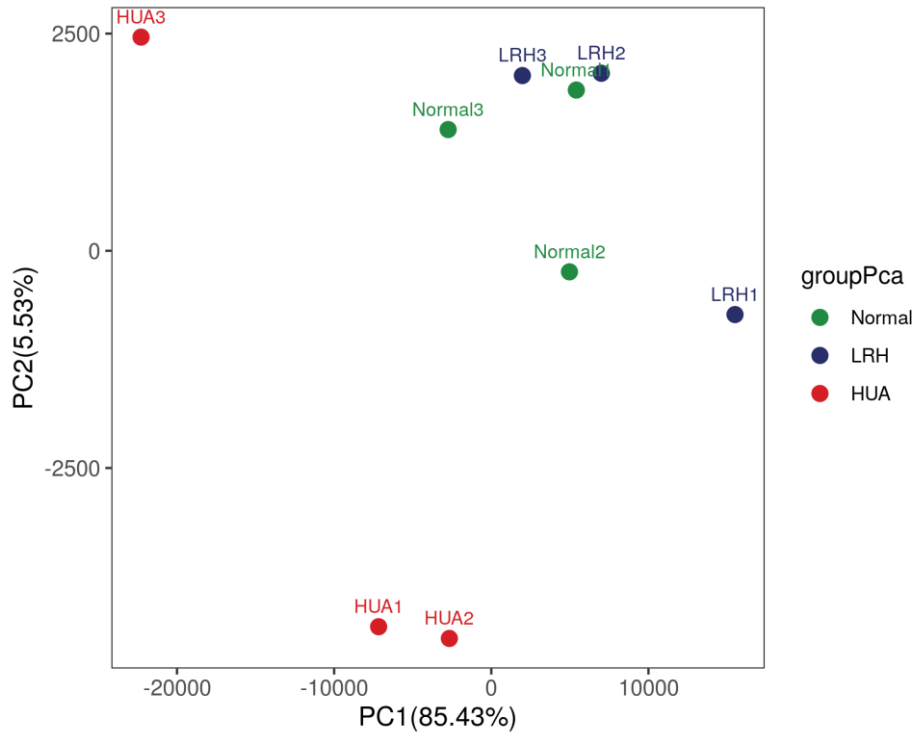

**Fig. S5.** Principal component analysis of individual replicates.

**Table S5.** FPKM values of 41 transcriptome-derived DEGs reversed by LRH.

| DEGs   | FPKM        |               |             |
|--------|-------------|---------------|-------------|
|        | Normal      | HUA           | LRH         |
| Abca4  | 2.73 ± 1.58 | 1.25 ± 0.72   | 2.45 ± 1.42 |
| Adipoq | 0.09 ± 0.05 | 0.56 ± 0.32   | 0.04 ± 0.02 |
| Alb    | 0.92 ± 0.53 | 0.45 ± 0.26   | 1.99 ± 1.15 |
| Casq1  | 0.49 ± 0.28 | 1.81 ± 1.05   | 0.33 ± 0.19 |
| Ccl5   | 2.05 ± 1.19 | 6.06 ± 3.5    | 0.61 ± 0.35 |
| Ccr2   | 0.64 ± 0.37 | 3.5 ± 2.02    | 0.44 ± 0.25 |
| Cd14   | 8.07 ± 4.66 | 47.58 ± 27.47 | 4.78 ± 2.76 |
| Cfi    | 3.32 ± 1.92 | 23.22 ± 13.41 | 2.7 ± 1.56  |
| Ctla4  | 0.01 ± 0    | 0.2 ± 0.12    | 0.01 ± 0.01 |
| Dnai1  | 0.05 ± 0.03 | 0.2 ± 0.11    | 0.04 ± 0.02 |
| Edn1   | 1.25 ± 0.72 | 3.32 ± 1.92   | 1.12 ± 0.65 |
| Fbn1   | 3.17 ± 1.83 | 6.73 ± 3.88   | 1.13 ± 0.65 |
| Fkbp10 | 3.09 ± 1.78 | 6.69 ± 3.86   | 1.8 ± 1.04  |

|          |               |                 |               |
|----------|---------------|-----------------|---------------|
| Gal      | 0 ± 0         | 0.21 ± 0.12     | 0 ± 0         |
| Havcr1   | 1.44 ± 0.83   | 130 ± 75.06     | 4.14 ± 2.39   |
| Hmgcs2   | 7.03 ± 4.06   | 2.93 ± 1.69     | 5.93 ± 3.42   |
| Hp       | 0.68 ± 0.39   | 1.86 ± 1.08     | 0.58 ± 0.33   |
| Irf4     | 0.12 ± 0.07   | 0.52 ± 0.3      | 0.1 ± 0.06    |
| Itgam    | 0.09 ± 0.05   | 0.61 ± 0.35     | 0.04 ± 0.02   |
| Itgb2    | 1.67 ± 0.96   | 4 ± 2.31        | 1.3 ± 0.75    |
| Itgb3    | 0.65 ± 0.38   | 1.62 ± 0.94     | 0.47 ± 0.27   |
| Krt18    | 27.63 ± 15.95 | 71.37 ± 41.2    | 24.77 ± 14.3  |
| Lcn2     | 2.5 ± 1.44    | 49.29 ± 28.46   | 4.57 ± 2.64   |
| Lgals1   | 78.29 ± 45.2  | 252.72 ± 145.91 | 73.43 ± 42.4  |
| Lpl      | 55.14 ± 31.83 | 24.66 ± 14.24   | 45.95 ± 26.53 |
| Lrrc66   | 10.84 ± 6.26  | 5.12 ± 2.96     | 9.44 ± 5.45   |
| Mmp3     | 0.17 ± 0.1    | 1.34 ± 0.77     | 0.1 ± 0.06    |
| Ngf      | 1.9 ± 1.1     | 4.49 ± 2.59     | 1.38 ± 0.8    |
| Orm2     | 0.24 ± 0.14   | 1.47 ± 0.85     | 0.15 ± 0.09   |
| Pdlim7   | 3.32 ± 1.92   | 7.58 ± 4.37     | 3.06 ± 1.77   |
| Runx1    | 0.17 ± 0.1    | 0.68 ± 0.39     | 0.18 ± 0.1    |
| Saa1     | 0.05 ± 0.03   | 0.84 ± 0.48     | 0.03 ± 0.02   |
| Serpine1 | 0.45 ± 0.26   | 1.83 ± 1.06     | 0.55 ± 0.32   |
| Serpinf1 | 1.07 ± 0.62   | 2.86 ± 1.65     | 0.87 ± 0.5    |
| Socs3    | 1.57 ± 0.91   | 7.47 ± 4.31     | 1.12 ± 0.65   |
| Sox9     | 0.31 ± 0.18   | 2.79 ± 1.61     | 0.22 ± 0.13   |
| Syk      | 0.4 ± 0.23    | 1.05 ± 0.6      | 0.39 ± 0.22   |
| Thbs4    | 0.17 ± 0.1    | 1.22 ± 0.7      | 0.08 ± 0.04   |
| Timp1    | 0.8 ± 0.46    | 27.51 ± 15.88   | 0.36 ± 0.21   |
| Tlr9     | 0.27 ± 0.16   | 0.81 ± 0.47     | 0.1 ± 0.06    |
| Wnt4     | 1 ± 0.58      | 2.1 ± 1.21      | 0.32 ± 0.18   |

**Table S6.** Top 10 KEGG pathways enriched by the 41 DEGs.

| Signaling pathways                  | Genes involved               |
|-------------------------------------|------------------------------|
| Rheumatoid arthritis                | Ccl5/Ctla4/Itgb2/Mmp3        |
| Complement and coagulation cascades | Cfi/Itgam/Itgb2/Serpine1     |
| Tuberculosis                        | Cd14/Itgam/Itgb2/Syk/Tlr9    |
| Phagosome                           | Cd14/Itgam/Itgb2/Itgb3/Thbs4 |
| TNF signaling pathway               | Ccl5/Edn1/Mmp3/Socs3         |
| Herpes simplex virus 1 infection    | Ccl5/Itgb3/Socs3/Syk/Tlr9    |
| Staphylococcus aureus infection     | Cfi/Itgam/Itgb2/Krt18        |
| Legionellosis                       | Cd14/Itgam/Itgb2             |
| Acute myeloid leukemia              | Cd14/Itgam/Runx1             |
| Pertussis                           | Cd14/Itgam/Itgb2             |

**Table S7.** Transcription factors for key genes in the TNF/NF- $\kappa$ B signaling pathway.

| TF        | Spi1 | Fos         | Nr4a1 |
|-----------|------|-------------|-------|
| Key genes | Ccl5 | Ccl5, Socs3 | Edn1  |

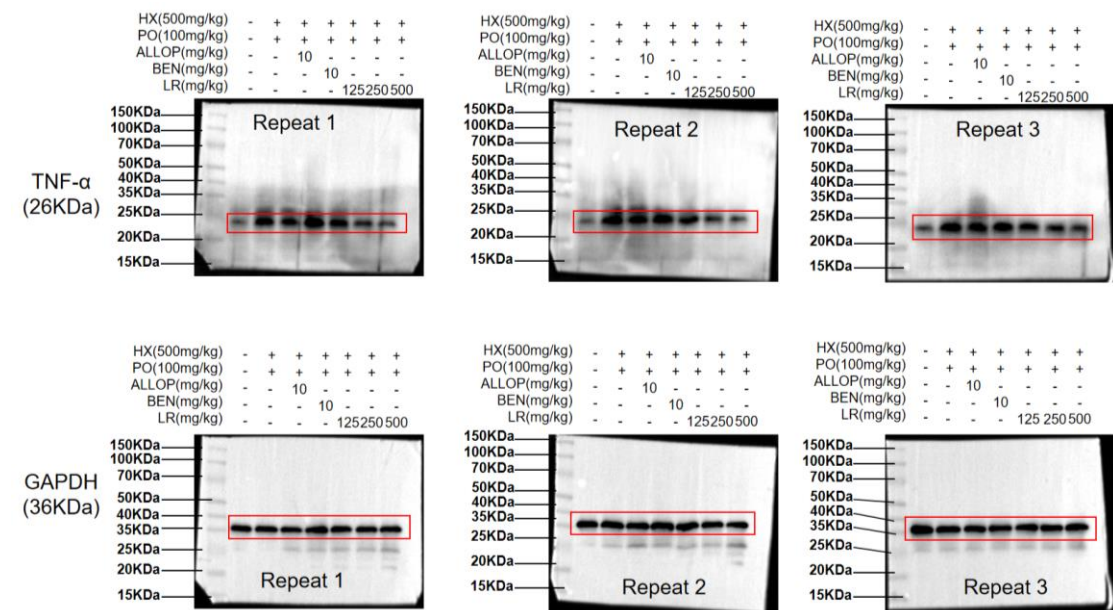

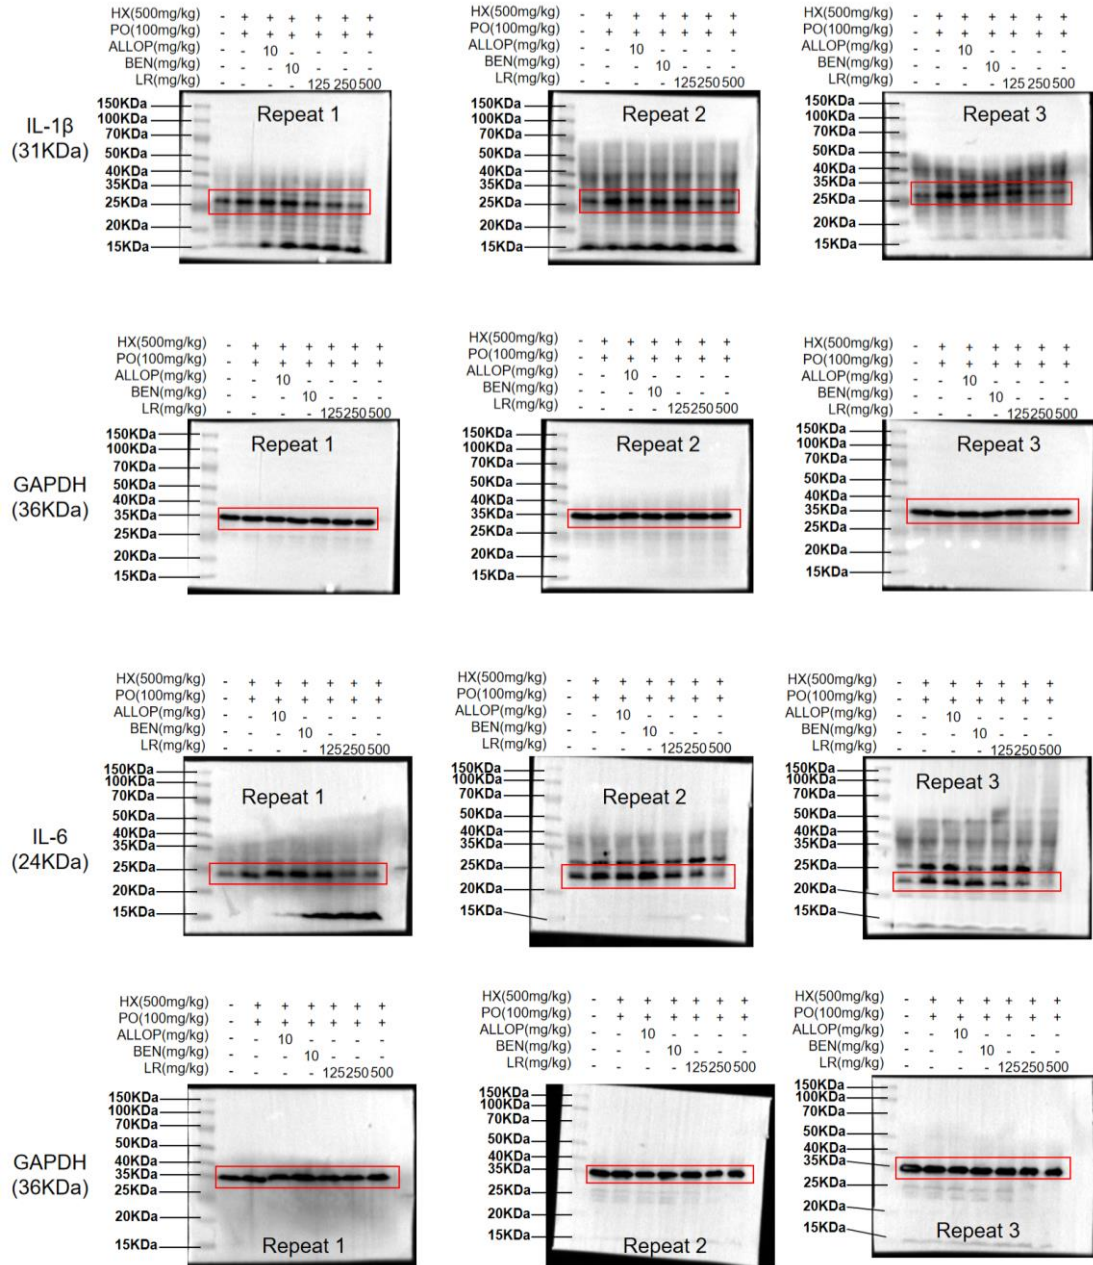



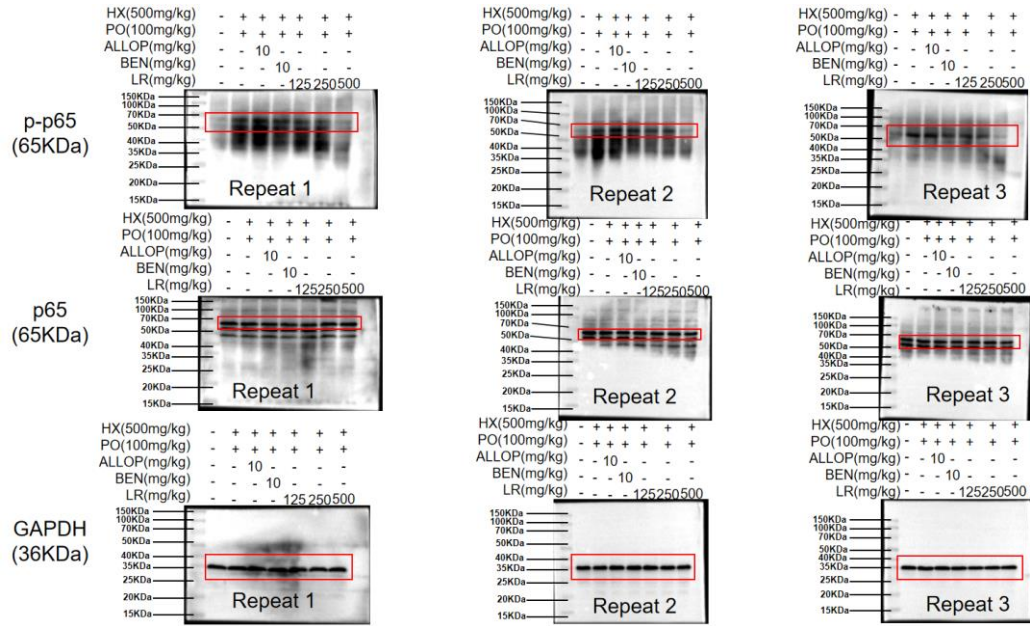

**Fig. S6.** Triplicate original TNF- $\alpha$ , IL-1 $\beta$ , IL-6, TNFR1, p-I $\kappa$ B $\alpha$ , I $\kappa$ B $\alpha$ , p-p65, p65 protein imprinting images of the Western blot analysis.

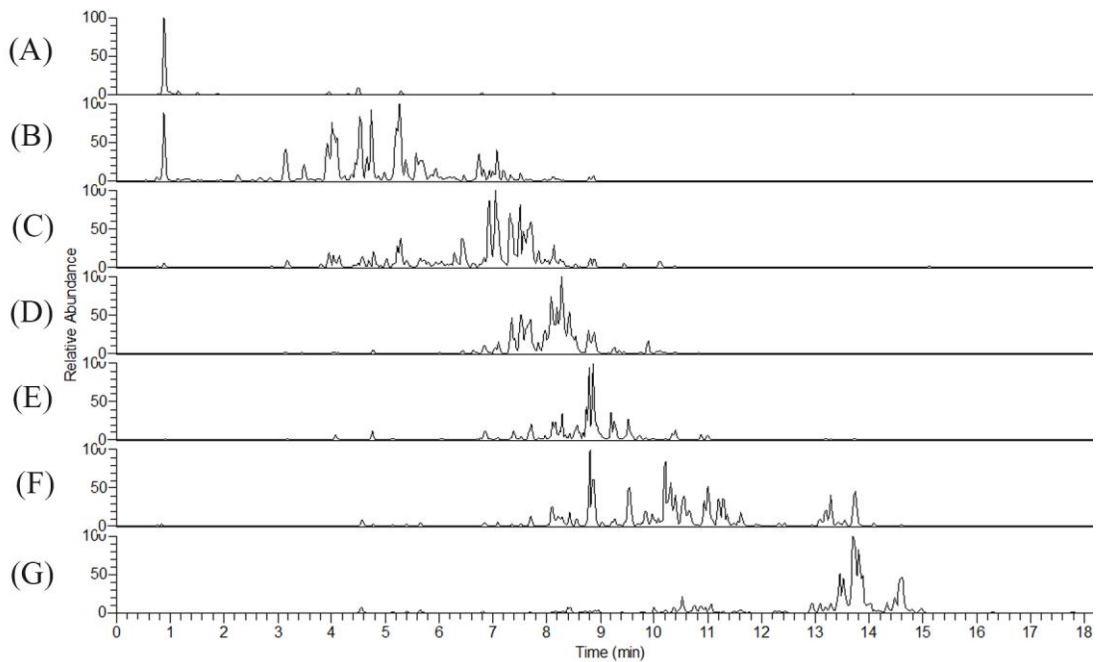

**Fig. S7.** The representative UHPLC-Q-Orbitrap HRMS base peak chromatogram (BPC) of the respective fractions. W1 (A), W2 (B), 25%MW (C), 35%MW (D), 50%MW (E), 60%MW (F), 70%MW (G).

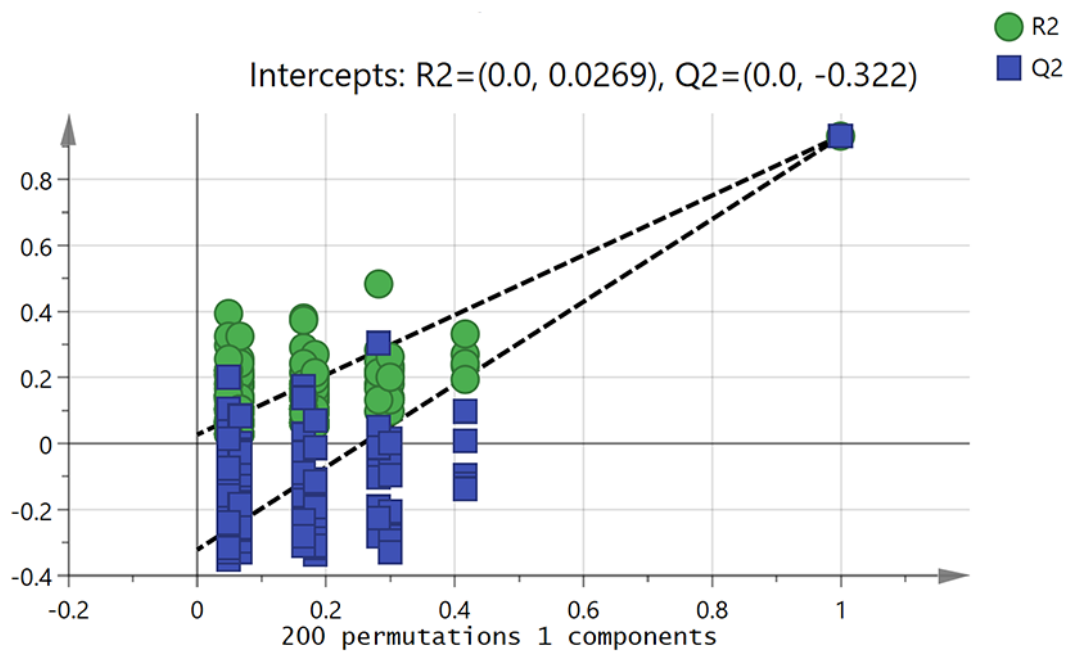

**Fig. S8.** Permutation test validation plot of the OPLS model.

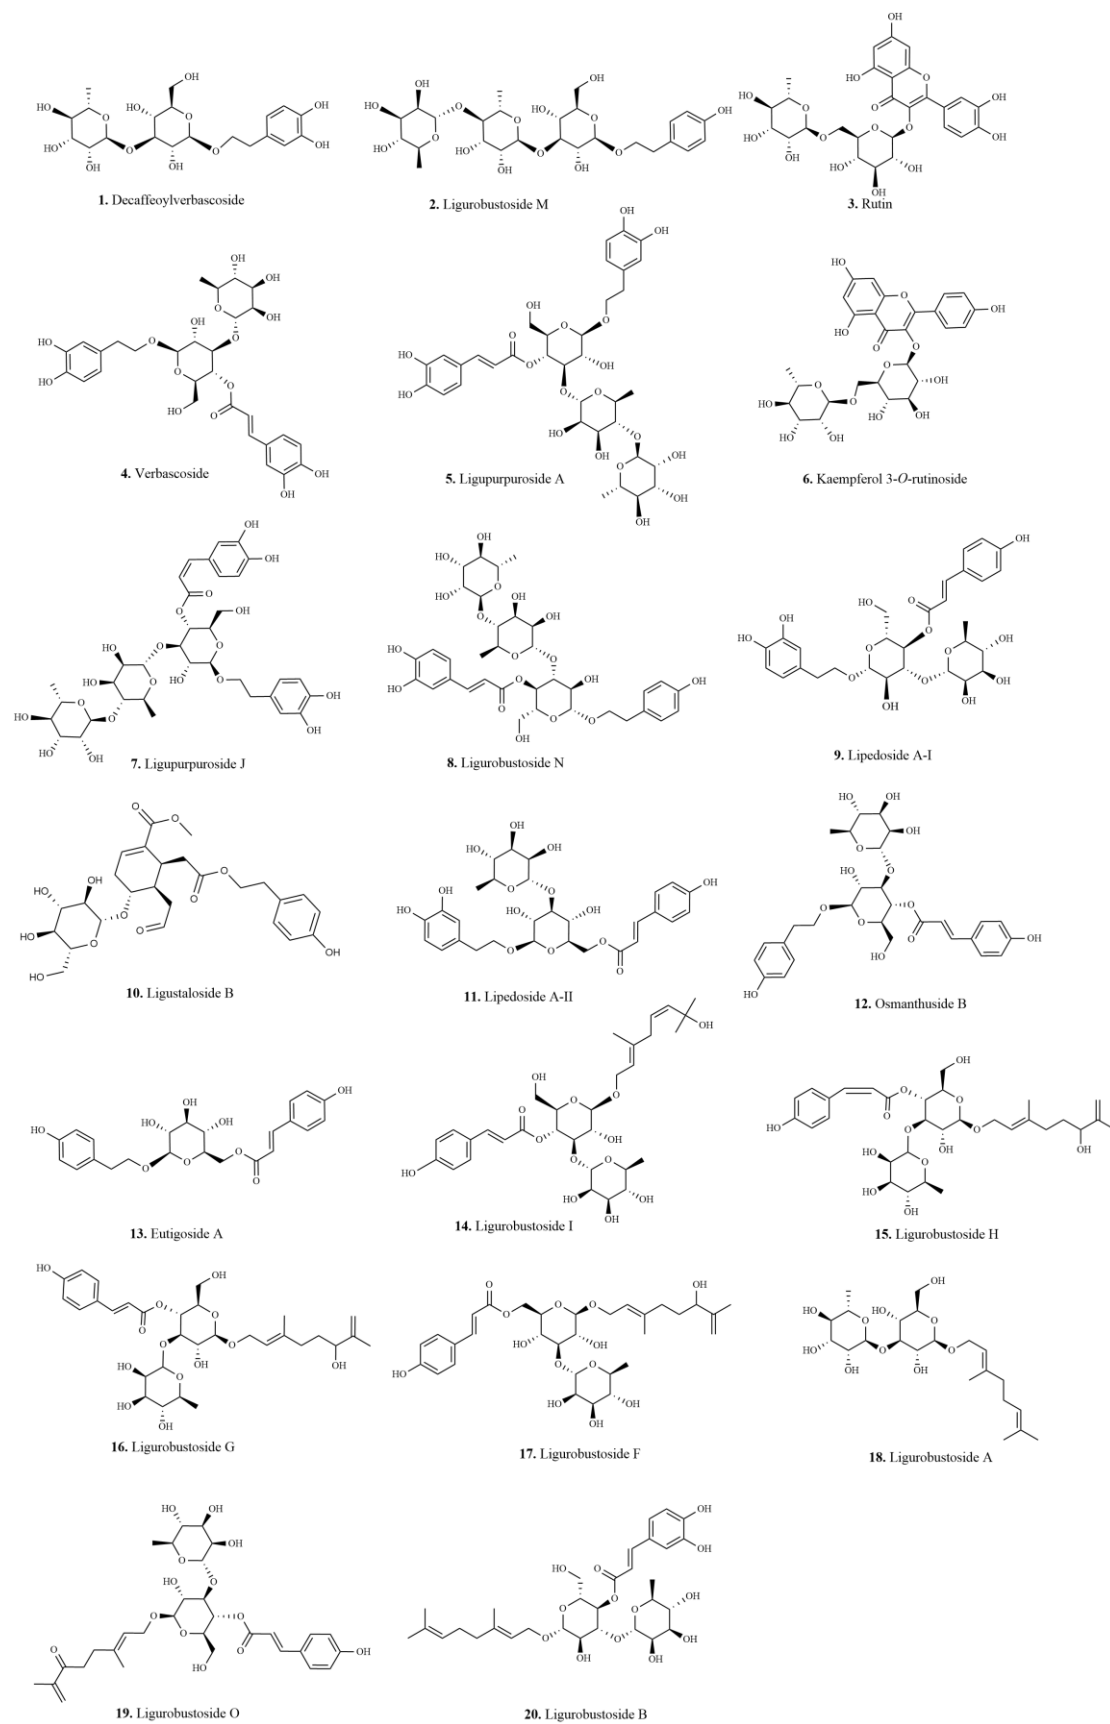

**Fig. S9.** Chemical structures of the 20 putative active compounds.

**Table S8.** 20 putative active components from LR: VIP values, RC values, and binding energies with XOD.

| ID | Compound                  | VIP  | RC       | Bind Energy<br>(kcal/mol) |
|----|---------------------------|------|----------|---------------------------|
| 1  | Decaffeoylverbascoside    | 1.10 | 1.49E-06 | -8.8                      |
| 2  | Ligurobustoside M         | 1.77 | 2.31E-06 | -9.2                      |
| 3  | Rutin                     | 2.54 | 9.05E-07 | -9.6                      |
| 4  | Verbascoside              | 1.44 | 6.00E-08 | -9.5                      |
| 5  | Ligupurpurososide A       | 6.76 | 8.42E-06 | -9.8                      |
| 6  | Kaempferol 3-O-rutinoside | 1.12 | 1.70E-06 | -9.6                      |
| 7  | Ligupurpurososide J       | 1.65 | 1.92E-06 | -9.5                      |
| 8  | Ligurobustoside N         | 1.94 | 2.30E-06 | -9.7                      |
| 9  | Lipidoside A-I            | 3.17 | 4.09E-06 | -9.5                      |
| 10 | Ligustaloside B           | 1.02 | 4.41E-07 | -7.4                      |
| 11 | Lipidoside A-II           | 1.69 | 2.09E-06 | -9.6                      |
| 12 | Osmanthuside B            | 1.35 | 1.68E-06 | -9.5                      |
| 13 | Eutigoside A              | 1.11 | 7.11E-07 | -9.2                      |
| 14 | Ligurobustoside I         | 1.19 | 7.93E-07 | -9                        |
| 15 | Ligurobustoside H         | 1.64 | 4.18E-06 | -7.9                      |
| 16 | Ligurobustoside G         | 1.46 | 3.19E-06 | -9                        |
| 17 | Ligurobustoside F         | 2.87 | 1.05E-06 | -8.8                      |
| 18 | Ligurobustoside A         | 1.01 | 3.61E-07 | -8.7                      |
| 19 | Ligurobustoside O         | 1.34 | 9.43E-07 | -9                        |
| 20 | Ligurobustoside B         | 2.62 | 9.58E-07 | -8.9                      |
| 21 | Allopurinol               | -    | -        | -6.5                      |
| 22 | Febuxostat                | -    | -        | -8.9                      |

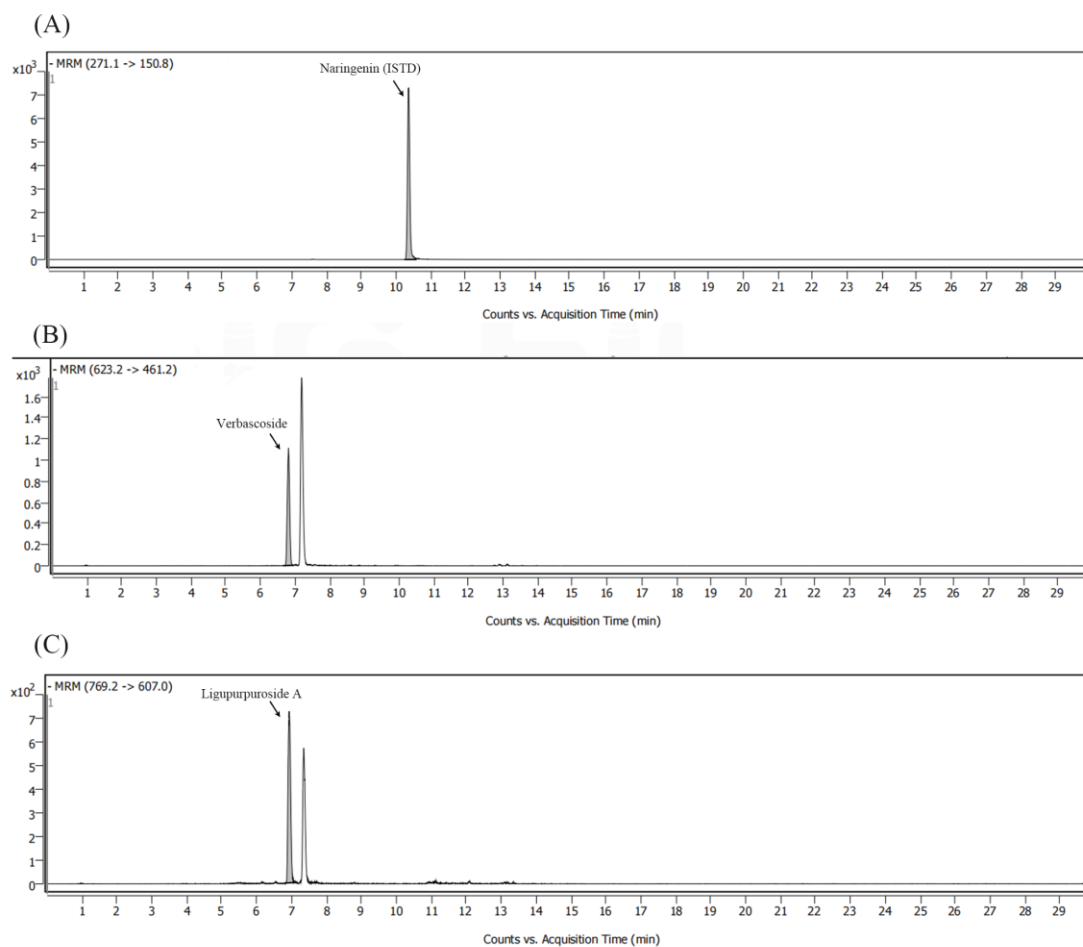

**Fig. S10.** Quantitative determination of compounds verbascoside (**4**) and ligupurpuroside A (**5**) by LC-MS. The MRM chromatograms of (A) naringenin (ISTD), (B) verbascoside, and (C) ligupurpuroside A in the LR.

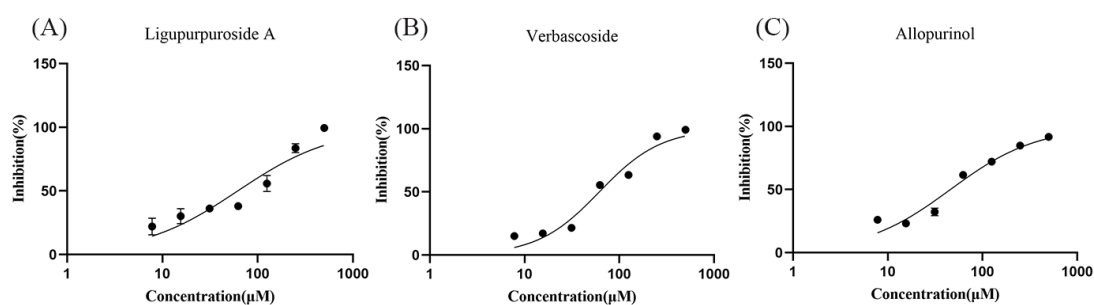

**Fig. S11.** Inhibitory effects of ligupurpuroside A, verbascoside, and allopurinol on XOD activity *in vitro*. The dose-response curves were fitted by nonlinear regression, and the half-maximal inhibitory concentration (IC<sub>50</sub>) values were calculated. Data are presented as the mean  $\pm$ SEM of three independent experiments.

## **1. Experimental Section**

### **1.1 Induction of HUA and treatment with drugs**

Mice were fed a standard laboratory chow diet and had free access to water throughout the experiment. Body weight was recorded at the beginning and end of the experiment. Excluding the Normal control group, the remaining mice were subjected to HUA induction over seven consecutive days by receiving PO (300 mg/kg/day) via intraperitoneal injection and HX (500 mg/kg/day) via oral gavage. On the third day of the experiment, the treatment groups were subjected to administration of the corresponding drugs. On the sixth experimental day, urine was collected from each group after dosing. Subsequently, on the seventh experimental day, blood was drawn from all mice following administration. Following collection, the blood was allowed to clot for 60 minutes. The samples were then centrifuged at 3000 rpm (4 °C) for 10 minutes to isolate the serum. Urine samples were processed under the same conditions to collect supernatants. Serum and urine supernatants were aliquoted for biochemical analysis, including measurements of UA, XOD, CRE, and BUN activity. For downstream analysis including H&E staining, Western blot, RT-qPCR, and transcriptomic analysis, the collected tissues were immediately frozen and archived at -80 °C.

The hyperuricemia model was established by co-administration of potassium oxonate (PO) and hypoxanthine (HX) for 7 days. This combined model is a well-recognized, widely used pharmacological hyperuricemia model in urate-lowering research, enabling rapid and reproducible induction of hyperuricemia for initial screening of functional food ingredients. Although it represents an acute pharmacological model rather than chronic multifactorial human hyperuricemia, it remains the most prevalent choice for evaluating urate-lowering efficacy and renal protection of natural products in preclinical studies.

### **1.2 Western blot analysis**

Western blotting was utilized to determine LR's effect on XOD expression in the liver, alongside quantifying the levels of UA transporters and pathway-related proteins in kidney tissue. Tissue proteins were extracted and quantified (using the BCA method).

Afterwards, protein denaturation was performed. Next, the protein samples underwent separation via Sodium Dodecyl Sulfate-Polyacrylamide Gel Electrophoresis (SDS-PAGE), followed by transfer to a membrane and exposure to a blocking solution. The membranes were then incubated with the primary antibodies overnight at 4 °C: XOD, GAPDH (1:10000); URAT1, GLUT9, OAT1, OAT4, and ABCG2 (1:3000); TNF- $\alpha$ , IL-1, IL-6, TNFR1, p-p65, p65, p-I $\kappa$ B $\alpha$ , and I $\kappa$ B $\alpha$  (1:5000). The membranes were then washed with the same volume of TBST and co-incubated with the corresponding secondary antibodies for 2 hours. The resulting fluorescent signals from the protein bands, generated via enhanced chemiluminescence, were captured and determined using an imaging system (Tanon, China). Protein levels were determined by the gray value analysis using Image J software.

### **1.3 RT-qPCR analysis**

The 20  $\mu$ L reaction mixture was prepared using 10  $\mu$ L of BrightCycle Universal SYBR Green qPCR Mix (containing UDG), 2  $\mu$ L of cDNA, 7.2  $\mu$ L of dd-H<sub>2</sub>O, and 0.4  $\mu$ L of both the forward and reverse primers. The qPCR thermal profile included an initial denaturation phase (95 °C for 3 min), succeeded by 40 cycles of amplification (95 °C for 5 s and 60 °C for 30–34 s).

### **1.4 Molecular dynamics simulation**

Molecular dynamics (MD) simulation was performed for XOD-ligupurpuroside A utilizing Amber 24 software. The protein was assigned to the Amber ff99 force field. The TIP3P explicit solvent model was implemented to solvate the protein system via the leap module, with the system geometry defined as a regular dodecahedron. The minimum distance between the solvent boundary and the protein structure was set to 15 Å. Cl<sup>-</sup> were introduced to neutralize the system, achieving a net charge of zero, thereby establishing the protein-solvent system. Periodic boundary conditions (PBC) were applied to the model to eliminate boundary artifacts. Following energy minimization of the system, the NPT ensemble (isothermal and isobaric) was employed to heat the system from 10 K to 300 K at constant volume over a duration of 100 ps. Subsequent to this, a 500 ps equilibrium simulation was conducted. Finally, the SHAKE algorithm was utilized to constrain the stretching of chemical bonds involving hydrogen

atoms. The integration time step of the simulation was set to 2 fs, and all restraints imposed on the system were released to initiate the production MD run. The simulation process was accelerated on Graphics Processing Units (GPUs) via compilation with the pmemd.cuda program.

Trajectory processing of the simulation was performed using the Amber traj program. Conformations of the simulated system were outputted at 2 fs intervals. The Root Mean Square Deviation (RMSD) and Root Mean Square Fluctuation (RMSF) were calculated for the complex system, protein C $\alpha$  atoms, receptor backbone, and small molecule, respectively. The Grace software was employed for the visualization of output conformations. MD trajectories were generated using the traj program, and the MMGBSA.py script was utilized to compute the average binding energy. Specifically, 50 conformations were selected from the stable phase (80–100 ns) of the trajectories where the RMSD fluctuated within 3 Å, with one frame extracted every 4 frames for the calculation.

### **1.5 Determination of XOD inhibitory activity**

Into a 96-well plate, 100  $\mu$ L of the test sample and 50  $\mu$ L of the 0.1 U/mL XOD solution were dispensed. The plate was subsequently oscillated for 30 seconds and then incubated at 25°C for 5 minutes. Next, 50  $\mu$ L of the 600  $\mu$ mol/L xanthine solution was introduced into the plate. Following 30 seconds of oscillation, the initial absorbance reading at 290 nm ( $A_1$ ) was promptly recorded. After further incubation for 25 minutes, the absorbance at 290 nm was measured again ( $A_2$ ). The percentage of XOD inhibition was determined according to the following formula: Inhibition rate (%) =  $[1 - (A_2 - A_1)$  of drug group /  $(A_2 - A_1)$  of blank group]  $\times$  100%.
